# Supplementary material
Source: PubMed Central journal article supplement (PMC2569903)
Supplement: 2008.951863_1.pdf [file 2008.951863_1.pdf]

**Supplemental Table 1**Oligonucleotide sequences of TaqMan probes and RT-PCR primers for targeting of *GAPDH* and *HPRT*

| Primer/Probe | Length (nt)/<br>T <sub>m</sub> (°C) | Sequence (5'-3') <sup>a</sup>                        | Position <sup>b</sup> |
|--------------|-------------------------------------|------------------------------------------------------|-----------------------|
| GAPDH-155F   | 29/60                               | CAACTACATGGTCTACATGTTCCAGTATG                        | 155-183               |
| GAPDH-155R   | 22/58                               | CTTCCCATTCTCAGCCTTGACT                               | 233-212               |
| GAPDH-784F   | 24/59                               | AGAAACCTG/CCAAGTATGATGACA                            | 784-807               |
| GAPDH-784R   | 20/59                               | AGCCCAGGATGCCCTTTAGT                                 | 861-842               |
| GAPDH-1019F  | 18/58                               | GGCCTACATGGCCTCCAA                                   | 1019-1036             |
| GAPDH-1019R  | 20/58                               | GGGCCTCTCTCTTGCTCTCA                                 | 1096-1077             |
| GAPDH-155P   | 24/69                               | (FAM)-CTACCCACGGCAAGTTCAACGGCA<br>(TAMRA)            | 187-210               |
| GAPDH-784P   | 19/68                               | (FAM)-TGGTGAAGCAGGCGGCCGA-(TAMRA)                    | 817-835               |
| GAPDH-1019P  | 25/69                               | (FAM)-AAGAAACCCTGGACCACCCAGCCC-<br>(TAMRA)           | 1041-1075             |
| HPRT-48F     | 17/68                               | CGAGCCGACCGGTTCTG                                    | 48-64                 |
| HPRT-48R     | 26/66                               | GGTCATAACCTGGTTCATCATCACTA                           | 96-121                |
| HPRT-640F    | 25/66                               | GCCCTTGACTATAATGAGCACTTCA                            | 640-664               |
| HPRT-640R    | 26/65                               | TCTTTTAGGCTTTGTACTTGGCTTTT                           | 702-727               |
| HPRT-1106F   | 22/62                               | AAAGCGCTCAGTTTCATATCAG                               | 1106-1128             |
| HPRT-1106R   | 20/64                               | ACGGTTGACAACGATTCACA                                 | 1175-1195             |
| HPRT-48P     | 24/75                               | (FAM)-ATGTCGACCCTCAGTCCCAGCGTC-<br>(TAMRA)           | 67-90                 |
| HPRT-640P    | 30/74                               | (FAM)-<br>TGAATCATGTTTGTGTCATCAGCGAAAGTG-<br>(TAMRA) | 671-700               |
| HPRT-1106P   | 24/68                               | (FAM)-AGCATCTAAGAGGTTTCCCCAGTG-<br>(TAMRA)           | 1132-1155             |

<sup>a</sup> The exon 5/6 boundary is indicated with a slash

<sup>b</sup> Primer and probe positions are given relative to the *Rattus norvegicus* genome (GenBank accession no. XM\_579386 and NM\_012583 for *GAPDH* and *HPRT*, respectively)
